# Supplementary material for: Interaction between Six Waxy Components in Summer Black Grapes (Vitis vinifera) and Mancozeb and Its Effect on the Residue of Mancozeb
Source: MDPI journal article supplement (doi:10.3390/ijms24097705), 2023-04-22
Supplement: s1 [file s1]

Table S1. Statistical table of wax extraction weight of fresh grapes and pesticide

| grapes (unit: mg/kg) |              |                  |
|----------------------|--------------|------------------|
| number               | fresh grapes | pesticide grapes |
| 1                    | 268          | 334              |
| 2                    | 264          | 306              |
| 3                    | 322          | 335              |
| 4                    | 348          | 427              |
| 5                    | 336          | 336              |
| 6                    | 320          | 302              |
| 7                    | 337          | 251              |
| 8                    | 310          | 340              |
| 9                    | 299          | 328              |
| 10                   | 385          | 340              |
| Average              | 319±36.3     | 329±43.8         |
| RSD                  | 11.5%        | 13.9%            |
| P                    | > 0.05       |                  |

Table S2 Some information about a part of components

| mcromolecule                                   | formula                                                       | CAS        | retention<br>time (min) |
|------------------------------------------------|---------------------------------------------------------------|------------|-------------------------|
| [ethylenebis-(dithiocarbamate)]-manganese      | C <sub>4</sub> H <sub>6</sub> MnN <sub>2</sub> S <sub>4</sub> | 301-03-1   | 8.9                     |
| oleanolic acid                                 | C <sub>30</sub> H <sub>48</sub> O <sub>3</sub>                | 508-02-1   | 52.9 <sup>a</sup>       |
| ursolic acid                                   | C <sub>30</sub> H <sub>48</sub> O <sub>3</sub>                | 77-52-1    | 53.5 <sup>a</sup>       |
| lupeol                                         | C <sub>30</sub> H <sub>50</sub> O                             | 545-47-1   | 20.5                    |
| octacosanol                                    | C <sub>28</sub> H <sub>58</sub> O                             | 557-61-9   | 22.4                    |
| hexacosanal                                    | C <sub>26</sub> H <sub>52</sub> O                             | 26627-85-0 | 18.9                    |
| γ-sitosterol                                   | C <sub>29</sub> H <sub>50</sub> O                             | 83-47-6    | 17.1                    |
| undecane                                       | C <sub>11</sub> H <sub>24</sub>                               | 1120-21-4  | 6.03                    |
| 2,2'-methylenebis(4-methyl-6-tert-butylphenol) | C <sub>23</sub> H <sub>32</sub> O <sub>2</sub>                | 119-47-1   | 15.9                    |
| ethyl tetracosanoate                           | C <sub>26</sub> H <sub>52</sub> O <sub>2</sub>                | 24634-95-5 | 18.5                    |
| heptadecanoic acid ethyl ester                 | C <sub>19</sub> H <sub>38</sub> O <sub>2</sub>                | 14010-23-2 | 20.7                    |

<sup>a</sup> indicates that the substance needs to be transformed into their corresponding trimethylsilyl derivatives by incubating in bis-N, O-(trimethylsilyl)trifluoroacetamide (BSTFA) so that it can be detected by GC-MS

Table S3 The docking results of mancozeb with six molecules at 298.15 K

| macromolecule        | number<br>of run | lowest<br>binding<br>energy<br>(kcal/mol) | estimated<br>Inhibition<br>constant, Ki<br>(mM, 298.15K) | integral<br>$\delta g^{\text{inter}}$ (a.u.) | of sum of all atomic<br>pair $\delta g$ indices |
|----------------------|------------------|-------------------------------------------|----------------------------------------------------------|----------------------------------------------|-------------------------------------------------|
| oleanolic acid       | 46               | -5.96                                     | 0.04                                                     | 0.803                                        | 3.15                                            |
| ursolic acid         | 56               | -5.87                                     | 0.05                                                     | 0.858                                        | 3.32                                            |
| lupeol               | 89               | -3.30                                     | 3.83                                                     | 0.646                                        | 2.53                                            |
| octacosanol          | 93               | -3.67                                     | 2.04                                                     | 0.487                                        | 1.82                                            |
| hexacosanal          | 39               | -3.82                                     | 1.58                                                     | 0.419                                        | 1.32                                            |
| $\gamma$ -sitosterol | 81               | -2.22                                     | 23.6                                                     | 0.719                                        | 2.74                                            |

Table S4 Recoveries of mancozeb at 1.0, 2.0, and 10.0 mg/kg

| concentration<br>(mg/kg) | recovery (%)   |                |                |                |                |                | average | RSD  |
|--------------------------|----------------|----------------|----------------|----------------|----------------|----------------|---------|------|
|                          | n <sub>1</sub> | n <sub>2</sub> | n <sub>3</sub> | n <sub>4</sub> | n <sub>5</sub> | n <sub>6</sub> | (%)     | (%)  |
| 1.0                      | 96.4           | 93.5           | 105            | 95.6           | 102.6          | 93.5           | 97.8    | 4.98 |
| 2.0                      | 105            | 94.6           | 99.1           | 104            | 90.6           | 89.2           | 97.1    | 7.00 |
| 10.0                     | 95.6           | 90.2           | 104            | 97.0           | 108.8          | 106            | 100.2   | 7.08 |

Table S5. Statistical table of mancozeb residues in two groups of grapes

| name | area     | concentration (mg/kg) | average (mg/kg) |
|------|----------|-----------------------|-----------------|
| K1   | 2.37E+05 | 6.47                  |                 |
| K2   | 2.16E+05 | 5.93                  | 5.97±0.47       |
| K3   | 2.00E+05 | 5.52                  |                 |
| Y1   | 2.86E+04 | 1.04                  |                 |
| Y2   | 3.01E+04 | 1.09                  | 1.12±0.09       |
| Y3   | 3.45E+04 | 1.22                  |                 |

K : mancozeb content in grapes before dewaxing

Y: mancozeb content in grapes after dewaxing

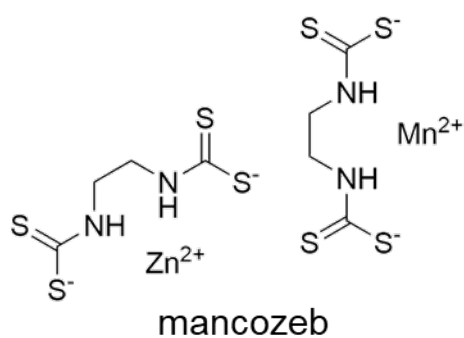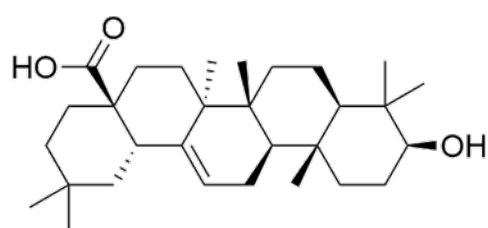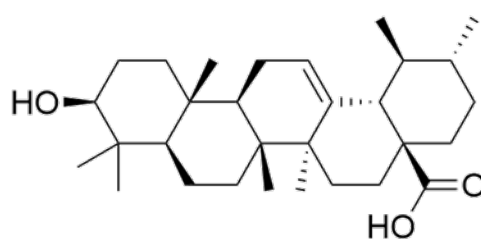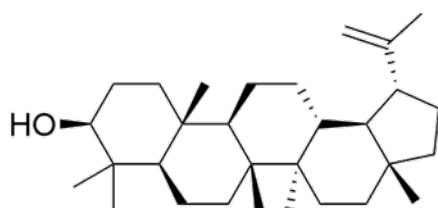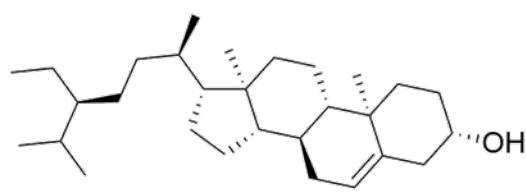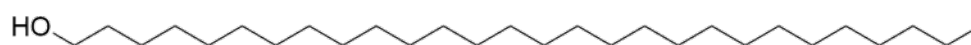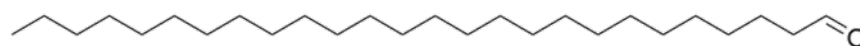

Figure S1 The structures of oleanolic acid, ursolic acid, lupeol, octacosanol, hexacosanal,  $\gamma$ -sitosterol and mancozeb

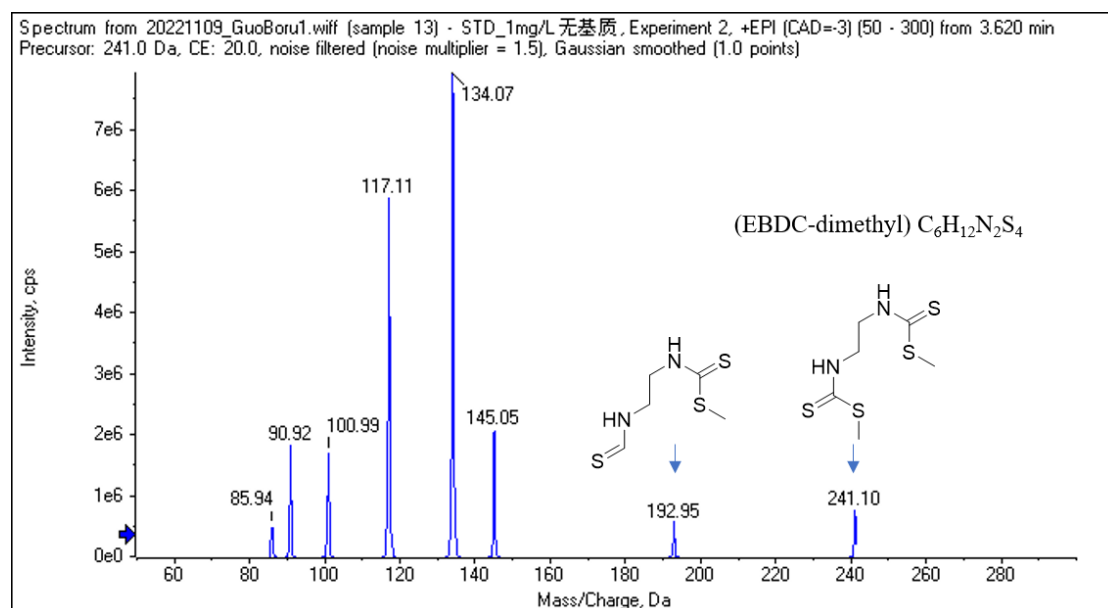

Figure S2 The mass spectrogram of mancozeb.
